# Supplementary material
Source: HighWire-hosted journal article supplement (https://erj.ersjournals.com/content/55/2/1901681)
Supplement: inline-supplementary-material-1 [file inline-supplementary-material-1.pdf]

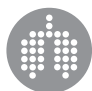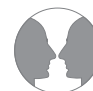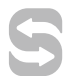

SHAREABLE PDF

# Physiological predictors of exertional oxygen desaturation in patients with fibrotic interstitial lung disease

Veronica Alfieri<sup>1,2</sup>, Ernesto Crisafulli<sup>1,3</sup>, Dina Visca<sup>2,4</sup>, Wing Ho Chong<sup>5,6</sup>, Carmel Stock<sup>2,7</sup>, Letizia Mori<sup>8</sup>, Angelo de Lauretis<sup>9</sup>, Vicky Tsipouri<sup>2</sup>, Felix Chua<sup>2</sup>, Vasilis Kouranos<sup>2</sup>, Maria Kokosi<sup>2</sup>, Charlotte Hogben<sup>2</sup>, Philip L. Molyneaux<sup>2,7</sup>, Peter M. George<sup>2,7</sup>, Toby M. Maher<sup>2,7</sup>, Alfredo A. Chetta<sup>1</sup>, Piersante Sestini<sup>10</sup>, Athol U. Wells<sup>2,7</sup> and Elisabetta A Renzoni<sup>2,7</sup>

**Affiliations:** <sup>1</sup>Dept of Medicine and Surgery, Respiratory Disease and Lung Function Unit, University of Parma, Parma, Italy. <sup>2</sup>Interstitial Lung Disease Unit, Royal Brompton Hospital, London, UK. <sup>3</sup>Dept of Medicine, Respiratory Medicine Unit, University of Verona, Verona, Italy. <sup>4</sup>Division of Pulmonary Rehabilitation, Istituti Clinici Scientifici Maugeri, IRCCS, Tradate, Italy. <sup>5</sup>Dept of Radiology, Tuen Mun Hospital, Hong Kong SAR. <sup>6</sup>Dept of Radiology, Royal Brompton Hospital, London, UK. <sup>7</sup>National Heart and Lung Institute, Imperial College, London, UK. <sup>8</sup>Respiratory Medicine, Northwick Park Hospital, Harrow, UK. <sup>9</sup>Unità Operativa Complessa di Pneumologia, ASST-Rhodese, Garbagnate Milanese, Italy. <sup>10</sup>Dept of Medicine, Surgery and Neuroscience, University of Siena, Siena, Italy.

**Correspondence:** Veronica Alfieri, Dept of Medicine and Surgery, Respiratory Disease and Lung Function Unit, University of Parma, Via Gramsci 14 – 43126, Parma, Italy. E-mail: veronica.alfieri@unipr.it

@ERSpublications

**In patients with interstitial lung disease, exertional hypoxaemia has quality of life and prognostic implications. A simple “DeOX” score predictive of exertional oxygen desaturation ( $S_{pO_2} \leq 88\%$  on 6MWT) is proposed, using  $S_{pO_2}$  at rest and  $D_{LCO}$ .** <http://bit.ly/36ytigE>

**Cite this article as:** Alfieri V, Crisafulli E, Visca D, *et al.* Physiological predictors of exertional oxygen desaturation in patients with fibrotic interstitial lung disease. *Eur Respir J* 2020; 55: 1901681 [<https://doi.org/10.1183/13993003.01681-2019>].

This single-page version can be shared freely online.

## To the Editor:

In patients with fibrotic interstitial lung disease (ILD), hypoxaemia on exertion is frequent, and contributes to exercise intolerance, exertional dyspnoea and reduced quality of life [1–3]. Clinically significant exertional hypoxaemia is typically defined as a drop in transcutaneous arterial oxygen saturation ( $S_{pO_2}$ ) to  $\leq 88\%$  on a 6-min walk test (6MWT) [4], and is associated with reduced survival in ILD patients [5].
